# Supplementary material for: Traditional knowledge on wild and cultivated plants in the Kilombero Valley (Morogoro Region, Tanzania)
Source: Springer Nature journal article supplement (doi:10.1186/s13002-017-0146-y), 2017-03-09
Supplement: MOESM1 [file 12132086]

# Ethnobotanical data collecting sheet

|                    |       |
|--------------------|-------|
| Informant code _ _ | Date: |
|--------------------|-------|

## 1. Informants' consent for the participation in the study:

---

Mimi..... (jina la mhusika), kwa hiari yangu na akili zangu timamu bila kulazimishwa, nimeamua kushiriki katika utafiti huu na ninaahidi kuwa kwa ulewa wangu wote, maelezo niliyoyatoa ni ya kweli. sahihi na yaliyo kamilika.

Tarehe.....Saini.....

## 2. Informant details:

---

Name:

Gender: M      F

Age:

Ethnic group:

Occupation:

Education:

Ethnobotanical expertise (*where/how the informant learned the expertise*):

Are you teaching it?

## 3. Location details:

---

Name of the village:

Region\ district:

Gps coordinate:

Altitude:

## 4. Notes:

---

|                           |              |
|---------------------------|--------------|
| <b>Informant code:</b> -- | <b>Date:</b> |
|---------------------------|--------------|

**1. Plant details:**

Collection number: (informant code + plant number) -- ----

Collector name:

Plant local common name:

Language:

Meaning of the local name:

Scientific name:

|         |          |  |
|---------|----------|--|
| Family: |          |  |
| Genus:  | Species: |  |

**2. Collected:**

Herbarium specimen: 

|     |    |
|-----|----|
| yes | no |
|-----|----|

 N. of specimens:

Seeds: 

|     |    |
|-----|----|
| yes | no |
|-----|----|

Photos: 

|     |    |        |
|-----|----|--------|
| yes | no | Files: |
|-----|----|--------|

**3. Plant description:**

Other 

|      |       |      |      |       |          |        |
|------|-------|------|------|-------|----------|--------|
| herb | shrub | tree | bulb | tuber | climbing | other: |
|------|-------|------|------|-------|----------|--------|

Other

characteristics:

|                     |                           |
|---------------------|---------------------------|
| <b>Wild species</b> | <b>Cultivated species</b> |
|---------------------|---------------------------|

Ecology:

Availability 

|        |                     |      |
|--------|---------------------|------|
| Common | Found in some areas | Rare |
|--------|---------------------|------|

|        |                  |      |
|--------|------------------|------|
| Common | Seasonal product | Rare |
|--------|------------------|------|

Availability on the market of plants/ seeds/ products:

Abundance respect the past:

---

| Uses:        | Plant part used: |
|--------------|------------------|
| Medicine     |                  |
| Food         |                  |
| Fodder       |                  |
| Poison       |                  |
| Raw material |                  |

**4. Cultivation (only for cultivated species):**

---

Propagation methods: 

|       |          |          |        |
|-------|----------|----------|--------|
| Seeds | Cuttings | Division | Other: |
|-------|----------|----------|--------|

Irrigation:

Fertilization:

Light requirement:

Pest and disease / control:

Others particular cultural cures:

**5. Harvest:**

---

Method and period of harvesting:

Storage:

**6. Details of use for medicinal plants:**

---

Disease(s) treated:

Method of drug preparation:

Treatment (way of assumption, dosage, frequency):

Side effects:

**7. Details of food uses:**

---

Method of food preparation:

**8. Raw material:**

---

Products

Method of preparation

**9. Other uses:**

---
