# Supplementary material for: Traditional knowledge on wild and cultivated plants in the Kilombero Valley (Morogoro Region, Tanzania)
Source: Springer Nature journal article supplement (doi:10.1186/s13002-017-0146-y), 2017-03-09
Supplement: MOESM2 [file 12132086]

**Additional file 2.** List of plants mentioned by informants in the study area and not botanically classified.

| Collection number | Family | Genus and species | Number of citations | Folk name      | Growing habits | wild\ cultivated | Main uses | Parts used    | Cured diseases | Other uses                       |
|-------------------|--------|-------------------|---------------------|----------------|----------------|------------------|-----------|---------------|----------------|----------------------------------|
| 01002             |        |                   | *                   | Mpingo         | tree           | W                | R         | log           |                | sculpture, necklaces             |
| 01006             |        |                   | *                   | Memenagolo     | tree           | W                | R         | branches      |                | poles                            |
| 01008             |        |                   | *                   | Mlyafiosi      | herb           | W                | R         | log           |                | hornamental sticks               |
| 01015             |        |                   | *                   | Finunu         | climber        | W                | F         | fruit         |                |                                  |
| 01022             |        |                   | *                   | Mkongo         | tree           | W                | R         | log           |                | furniture                        |
| 01024             |        |                   | *                   | Mkelegeti      | tree           | W                | F         | fruit         |                |                                  |
| 01026             |        |                   | *                   | Kisani         | shrub          | W                | R         | branches      |                | shephard sticks                  |
| 01028             |        |                   | *                   | Mpande, Mkwaju | tree           | W,C              | F         | fruit         |                |                                  |
| 01030             |        |                   | *                   | Nalufumbula    | herb           | W                | M         | leaves        | nightmares     |                                  |
| 01031             |        |                   | *                   | Lupusa         | tree           | W                | R         | branches      |                | arrows                           |
| 01032             |        |                   | *                   | Likamanda      | climber        | W                | M         | sap           | wounds         |                                  |
| 01038             |        |                   | *                   | Sunguluti      | tree           | W                | R         | branches      |                | chairs                           |
| 01044             |        |                   | *                   | Mulimuli       | tree           | W                | F         | fruit         |                |                                  |
| 01045             |        |                   | *                   | Pembaduma      | tree           | W                | M         | leaves, roots | hernia         |                                  |
| 01046             |        |                   | *                   | Mandala        | tree           | W                | O         | seeds         |                | ritual against eyes diseases     |
| 01047             |        |                   | *                   | Lulemambale    | climber        | W                | R         | bark          |                | ropes                            |
| 02001             |        |                   | *                   | Kitundawe      | tree           | C                | M,O       | leaves, roots | nightmares     | house protection against witches |

|       |   |                 |           |     |      |               |                                                                       |                                      |
|-------|---|-----------------|-----------|-----|------|---------------|-----------------------------------------------------------------------|--------------------------------------|
| 02002 | * | Mauwa sumu      | succulent | W,C | O    | sap, plant    |                                                                       | termites control, decoration, poison |
| 02011 | * | Mpiripisi,      | tree      | C   | F    | fruit         |                                                                       |                                      |
| 05001 | * | Msungula        | shrub     | W   | M    | leaves, roots | wounds                                                                |                                      |
| 05002 | * | Msungula, Mdogo | shrub     | W   | M    | leaves        | pain and inflammations                                                |                                      |
| 05003 | * | Nyawahe         | herb      | W   | M    | roots, leaves | wounds                                                                |                                      |
| 05007 | * | Mhumbahumba     | shrub     | W   | M    | roots, leaves | malaria                                                               |                                      |
| 05009 | * | Mkwambekwambe   | shrub     | W   | M    | plant         | pain and inflammations, gynaecological, andrological and urinogenital |                                      |
| 05011 | * | Msheli          | herb      | W,C | O    | plant         |                                                                       | snake protection, decoration         |
| 05013 | * | Msangalasi      | tree      | W   | O    | roots, leaves |                                                                       | treatment effect increaser           |
| 05014 | * | mnepa           | tree      | W   | R,O  | log, leaves   |                                                                       | furnitures, love potion              |
| 05018 | * | Munylava        | herb      | W   | M    | leaves        | fever                                                                 |                                      |
| 05020 | * | Mungwasi        | shrub     | W   | M    | leaves        | pain and inflammations                                                |                                      |
| 05021 | * | Muswavi         | herb      | W   | M    | plant         | pain and inflammations                                                |                                      |
| 05022 | * | Macho ya mlungu | climber   | W   | M, O | leaves, fruit | aphrodisiac                                                           | against evil eyes,                   |

|       |   |                      |         |   |   |              |                                               |                      |
|-------|---|----------------------|---------|---|---|--------------|-----------------------------------------------|----------------------|
| 05027 | * | Mnygi                | herb    | W | M | plant        | animal disease                                |                      |
| 05031 | * | Mzilinga             | herb    | W | M | leaves       | weakness and faints                           |                      |
| 05032 | * | Mwija, Mwiza         | tree    | W | R | bark         |                                               | colorant             |
| 05033 | * | Mgoweko              | tree    | W | M | leaves, bark | pain and inflammations                        |                      |
| 05034 | * | Mninga, Muvembadanda | tree    | W | M | bark         | gynaecological, andrological and urinogenital |                      |
| 05035 | * | Mugundutati          | tree    | W | M | leaves       | gynaecological, andrological and urinogenital |                      |
| 05036 | * | Mtundufulu           | herb    | W | O | plant        |                                               | harvesting ritual    |
| 05037 | * | Muhafue              | tree    | W | M | leaves       | weakness and faints                           |                      |
| 05041 | * | Mwesefu              | shrub   | W | O | leaves       |                                               | mosquito repellent   |
| 05042 | * | Mulaganzuki          | tree    | W | O | flowers      |                                               | bees attractor       |
| 05043 | * | Mwija                | tree    | W | M | leaves       | animal disease                                |                      |
| 05044 | * | Mdomongo             | tree    | W | M | sap          | wounds                                        |                      |
| 05045 | * | Mwitosi              | herb    | W | M | roots        | respiratory                                   |                      |
| 05047 | * | Mweli                | tree    | W | O | leaves       |                                               | against evil spirits |
| 05048 | * | Mtunumbi             | tree    | W | M | leaves       | weakness and faints                           |                      |
| 05049 | * | Mukwangwasale        | climber | W | M | roots        | parasites                                     |                      |
| 05050 | * | Mndukule             | herb    | W | M | roots        | bites                                         |                      |

|       |   |                |       |   |   |               |                                                        |            |
|-------|---|----------------|-------|---|---|---------------|--------------------------------------------------------|------------|
| 05051 | * | Mfagio         | herb  | W | R | plant         |                                                        | brooms     |
| 05052 | * | Mbodogo        | tree  | W | M | leaves        | animal disease                                         |            |
| 05055 | * | Nyakatitu      | tree  | W | M | leaves        | bones fractures                                        |            |
| 05056 | * | Mmemena        | tree  | W | M | leaves        | eyes diseases                                          |            |
| 05057 | * | Mjendiko       | shrub | W | M | roots, leaves | cardio-circulatory                                     |            |
| 06005 | * | Miashoki       | tree  | C | O | plant         |                                                        | decoration |
| 07005 | * | Mtopetope      | tree  | W | M | bark, leaves  | eyes diseases<br>respratory                            |            |
| 07006 | * | Muvembadanda   | tree  | W | M | roots, leaves | gastrointestinal                                       |            |
| 07007 | * | Mchichapori    | herb  | W | M | leaves        | gastrointestinal                                       |            |
| 07008 | * | Nyawahe        | herb  | W | M | leaves        | gastrointestinal                                       |            |
| 07010 | * | Limoyo         | tree  | W | M | roots         | cardio-circulatory                                     |            |
| 07013 | * |                | tree  | W | M | leaves        | weakness and faints                                    |            |
| 07016 | * | Mtogo          | tree  | W | M | bark          | gynaecological,<br>andrological<br>and<br>urinogenital |            |
| 07017 | * | Mpingipingi    | tree  | W | M | bark          | gynaecological,<br>andrological<br>and<br>urinogenital |            |
| 08002 | * | Kikwambikwambi | shrub | W | M | leaves        | gynaecological,<br>andrological<br>and<br>urinogenital |            |
| 08009 | * | Sugusugu       | tree  | W | M | roots         | gastrointestinal                                       |            |

|       |   |                       |         |   |     |               |                                                        |                           |
|-------|---|-----------------------|---------|---|-----|---------------|--------------------------------------------------------|---------------------------|
| 09001 | * | Mkombajiko            | tree    | W | M   | leaves, roots | gynaecological,<br>andrological<br>and<br>urinogenital |                           |
| 09002 | * | Msada                 | climber | W | O   | leaves        |                                                        | wild animal<br>repellent  |
| 09006 | * | Mtutuma               | tree    | W | M   | roots         | parasites                                              |                           |
| 09007 | * | Mkwambekwambe         | tree    | W | M   | roots         | pain and<br>inflammations                              |                           |
| 09008 | * | Mtopetope             | tree    | W | M   | bark, leaves  | parasites,<br>gastrointestinal                         |                           |
| 09014 | * | Luchici               | herb    | W | M   | roots         | headache                                               |                           |
| 09015 | * |                       | herb    | W | M,O | leaves        | otitis,<br>hemorrhoids                                 | against evil<br>spirits   |
| 09016 | * |                       | climber | W | M   | leaves        | weakness and<br>faints                                 |                           |
| 09017 | * | Msolwa                | tree    | W | O   | branches      |                                                        | ritual against<br>thieves |
| 10001 | * | Madelapori            | herb    | W | M   | leaves        | hemorrhoids                                            |                           |
| 10002 | * | Mnunganunga, Mavimavi | herb    | W | M,O | leaves        | malaria                                                | against evil<br>spirits   |
| 10005 | * | Mderega               | herb    | C | F   | leaves        |                                                        |                           |
| 10007 | * | Embegonogo            | tree    | C | F   | fruit         |                                                        |                           |
| 10009 | * | Ina                   | shrub   | C | O   | leaves        |                                                        | nails<br>colorant         |

Frequency: \* one citation; \*\* two citations; \*\*\*: three citations; \*\*\*\*: four citations.

C: cultivated species, W: wild species, WC: both wild and cultivated species.

M: medicinal use, F: food use, R: production of raw material, O: other uses
